# Supplementary material
Source: HighWire-hosted journal article supplement (https://bmjopen.bmj.com/content/14/11/e082946)
Supplement: inline-supplementary-material-2 [file inline-supplementary-material-2.pdf]

**S2 Table** All databases search strategy.**PubMed**

("social support"[mesh] OR "social support"[tiab] OR ((social[tiab] OR famil\*[tiab] OR parent\*[tiab] OR OR peer[tiab] OR spous\*[tiab] OR neighbor\*[tiab] OR friend\*[tiab] OR child\*[tiab] OR coworker\*[tiab] OR co-worker\*[tiab] OR colleague\*[tiab]) AND (support\*[tiab] OR network\*[tiab] OR encourage\*[tiab]))) AND ("Diet, Food, and Nutrition"[Mesh] OR diet\*[tiab] OR nutrition\*[tiab] OR alimentary[tiab] OR meal\*[tiab] OR food\*[tiab] OR eating[tiab]) AND ("Diabetes Mellitus, Type 2"[mesh] OR diabet\*[tiab]) AND (control\*[tiab] [tiab])

**Embase**

('social support'/exp OR 'social support':ab,ti OR ((social:ab,ti OR famil\*:ab,ti OR parent\*:ab,ti OR peer:ab,ti OR spous\*:ab,ti OR neighbor\*:ab,ti OR friend\*:ab,ti OR child\*:ab,ti OR coworker\*:ab,ti OR 'co-worker':ab,ti OR colleague\*:ab,ti) AND (support\*:ab,ti OR network\*:ab,ti OR encourage\*:ab,ti))) AND ('diet'/exp OR 'nutrition'/exp OR diet\*:ab,ti OR nutrition\*:ab,ti OR alimentary:ab,ti OR meal\*:ab,ti OR food\*:ab,ti OR eating:ab,ti) AND ('non insulin dependent diabetes mellitus'/exp OR diabet\*:ab,ti) AND (control\*:ab,ti)

**CINAHL**

((MH "Support, Social+") OR "social support" OR TI ((social OR famil\* OR parent\* OR peer OR spous\* OR neighbor\* OR friend\* OR child\* OR coworker\* OR co-worker\* OR colleague\*) AND (support\* OR network\* OR encourage\*) ) OR AB ( (social OR famil\* OR parent\* OR peer OR spous\* OR neighbor\* OR friend\* OR child\* OR coworker\* OR co-worker\* OR colleague\*) AND (support\* OR network\* OR encourage\*))) AND ((MH "Nutrition+") OR TI ( diet\* OR nutrition\* OR alimentary OR meal\* OR food\* OR eating ) OR AB ( diet\* OR nutrition\* OR alimentary OR meal\* OR food\* OR eating )) AND ((MM "Diabetes Mellitus, Type 2") OR TI diabet\* OR AB diabet\* ) AND (TI ( control ) OR AB ( control))

**Scopus**

( TITLE-ABS ( "social support" OR ( ( social OR fami\* OR parent\* OR peer OR spous\* OR neighbor\* OR friend\* OR child\* OR coworker\* OR co-worker\* ) AND ( support\* OR network\* OR encourage\* ) ) ) AND TITLE-ABS ( diet\* OR nutrition\* OR alimentary OR meal\* OR food\* OR eating ) AND TITLE-ABS ( diabet\* ) AND TITLE-ABS ( control ) )

**CENTRAL**

("social support" OR ((social OR fami\* OR parent\* OR peer OR spous\* OR neighbor\* OR friend\* OR child\* OR coworker\* OR co-worker\*) AND (support\* OR network\* OR encourage\*))) :ti,ab,kw AND (( diet\* OR nutrition\* OR alimentary OR meal\* OR food\* OR eating )) :ti,ab,kw AND (diabet\*) :ti,ab,kw

**ProQuest Dissertations and Theses**

abstract("social support" OR ((social OR famil\* OR parent\* OR peer OR spous\* OR neighbor\* OR friend\* OR child\* OR coworker\* OR co-worker\* OR colleague\*) AND (support\* OR network\* OR encourage\*))) OR title("social support" OR ((social OR famil\* OR parent\* OR peer OR spous\* OR neighbor\* OR friend\* OR child\* OR coworker\* OR co-worker\* OR colleague\*) AND (support\* OR network\* OR encourage\*))) AND (abstract(("Diet, Food, and Nutrition" OR diet\* OR nutrition\* OR alimentary OR meal\* OR food\* OR eating)) OR title(("Diet, Food, and Nutrition" OR diet\* OR nutrition\* OR alimentary OR meal\* OR food\* OR eating))) AND (abstract((diabet\*)) OR title((diabet\*))) AND (abstract(control\* OR cohort OR "interrupted time-series") OR title(control))
